# Supplementary material for: Prognostic significance of thyroid hormone T3 in patients with septic shock: a retrospective cohort study
Source: PeerJ. 2023 May 16;11:e15335. doi: 10.7717/peerj.15335 (PMC10198161; doi:10.7717/peerj.15335)
Supplement: Data S2 [file peerj-11-15335-s002.xls]

## Sheet: raw data
G	Age	Site of infection	CRRT	SBP/DBP	MAP	PT	APTT	DD	Fig	PLT	WBC	N	PCT	Scr	Bun	pro	AST	ALT	TT3（0.89-2.44）	TT4(63-151)	TSH(0.35-4.94)	FT3(2.63-5.7)	FT4(9-19)
F	60	Urinary tract	2	93/69	77	15.3	41.8	19.5	4.64	78	12.5	94.4	12.34	144	7.79	30.6	29	24	0.82	88.6	2.46	2.91	15.84
M	91	peritonitis	2	80/40	47	20.6	72.6	26.2	1.05	31	1.41	82.3	>100	78	8.1	25.1	250	62	0.42	34.1	2.392	1.03	9.78
M	75	gastroenteritis	5	120/59	79	12.1	26.3	11.04	4.75	197	6.06	74.4	5.54	319	16.8	27.7	15	14	0.52	64.4	0.876	1.3	12.21
M	66	pneumonia	14	130/75	97	18.6	51.1	6.19	5.08	159	1.23	57	>100	240	16.4	28.2	139	41	0.79	67.44	0.3352	1.52	7.74
F	71	Infection of bile system	2	106/65	79	13.7	32	4.78	5.52	29	40.66	77.9	65.52	307	15.2	29.6	736	768	0.56	71.06	0.8369	1.73	13.27
M	33	peritonitis		60/42	48	17.5	55.1	16.2	4.42	422	4.88	79.9	>100	177	8.8	21.8	221	175	0.51	43	1.8771	1.75	9.78
F	43	Infection of the central nervous system	5	85/45	58	22.7	64	1.81	2.51	33	16.08	89	18.64	54	7.4	19.7	62	26	0.79	67.44	0.3352	1.52	12.21
M	84	pneumonia	5	79/59	66	14.9	38.1	1.74	8.14	121	11.36	88.5	5.42	222	19.8	22.4	16	18	0.38	36.38	0.3688	1.84	7.74
F	79	Urinary tract	3	138/70	92	13.1	27.8	14.13	3.32	47	18.73	93	1.84	79	18.29	28.9	13	26	0.82	88.6	2.46	2.91	15.84
M	76	Infection of bile system	4	85/43	57	14	37.5	2.54	3.79	15	7.92	88.4	92.18	171	11.2	23.9	252	165	0.42	34.1	2.392	1.03	12.21
F	35	peritonitis	5	90/60	70	30.3	78.4	5.05	3.89	144	2.38	74.8	35.91	91	7.7	27	40	17	0.52	64.4	0.876	1.3	7.74
M	69	gastroenteritis	5	76/54	58	21.3	121	43	1.28	126	23.36	81.5	17.54	282	14.9	27.1	41	54	0.79	67.44	0.3352	1.52	15.84
M	43	soft tissue infection	3	120/80	94	19.4	68.5	1.23	4.01	91	11.32	92.8	13.54	83	4.8	22.8	104	46	0.56	71.06	0.8369	1.73	13.27
M	27	gastroenteritis		90/40	57	27.1	63	1.83	1.64	40	15	77.8	25.8	114	9.3	18.7	107	71	0.51	43	1.8771	1.75	9.78
F	52	gastroenteritis		79/56	64	43	102.1	14.86	1.61	154	10.54	80.8	100	221	22.8	25.1	5599	2990	0.79	67.44	0.3352	1.52	12.21
M	61	peritonitis	3	70/50	57	22.5	73.6	16.83	2.52	50	17.43	94.4	70.9	234	13	19.9	65	39	0.38	36.38	0.3688	1.84	7.74
F	62	Paravertebral abscess	3	85/53	64	12.9	37.1	11.35	1.7	169	11.39	84.8	2.54	224	22.3	28.6	14	7	0.79	67.44	0.3352	1.52	12.21
M	80	Infection of bile system		90/60	70	13.5	31	24.95	3.49	305	5.39	77.6	6.64	91	6.5	35.9	54	121	0.51	51.78	2.0625	1.54	9.41
M	59	pneumonia	3	84/64	71	14.9	48.1	2.3	4.6	103	30.67	95.1	69	86	16.6	26.1	48	17	0.79	67.44	0.3352	1.52	12.21
M	67	Urinary tract	5	140/90	107	16.9	41.3	2.21	3.31	89	19.01	90.6	>100	214	12.46	27.7	15	12	0.49	52.45	1.2926	1.54	8.37
M	62	pneumonia		110/60	77	11.2	39.3	6.13	6.01	255	6.52	92	2.36	63	6.5	20.9	176	92	0.8	69.78	0.0653	2.52	10.14
M	74	Infection of bile system	2	76/48	57	20.6	52	3.5	3.72	88	27.46	96.6	>100	172	9.2	24.9	242	156	0.7	63.02	0.5723	2.2	12.4
M	60	pneumonia	8	144/94	111	15.8	42.6	9.75	4.6	174	7.4	83.6	2.43	130	21.29	22.9	86	54	0.42	34.1	2.392	1.03	7.9
F	66	Bloodstream infections	2	132/81	98	19.9	98.6	7.16	2.42	36	20.85	73.7	93.1	144	8.4	26.9	379	143	0.52	64.4	0.876	1.3	10.2
F	80	Urinary tract		138/70	93	28	68	11.39	4.42		6.36	85.6	48.56	86	8.9	34.7	48	22	0.79	67.44	0.3352	1.52	12.21
M	87	pneumonia		127/89	101	>150	>180	>50	0.25	134	21.3	92	>100	125	8.3	21.7	285	365	0.49	52.45	1.2926	1.54	8.37
F	18	pneumonia		63/30	41	21.7	52.2	18.16	2.62	137	22.39	96.8	>100	197	9.4	28	45	16	0.8	69.78	0.0653	2.52	10.14
M	58	Infection of bile system		87/61	66	12.1	30.5	1.54	4.64	82	9.26	84.9	15.58	88	5.8	33.1	40	36	0.79	67.44	0.3352	1.52	12.21
M	88	pneumonia		45/25	32	21.7	44.6	2.97	6.9	137	18.79	88.6	>100	114	11.3	18.1	1189	391	0.49	52.45	1.2926	1.54	8.37
M	81	pneumonia	3	127/65	86	30.3	78.4	5.05	3.89	250	27	90.7	67.94	76	5.3	24.6	21	14	0.8	69.78	0.0653	2.52	10.14
M	72	Bloodstream infections	11	85/42	56	23	47.7	11.04	1.49	26	19.39	92.6	>100	329	12	16	2665	1261	0.7	63.02	0.5723	2.2	12.4
F	60	pneumonia	25	117/59	79	10.8	44.3	6.99	2.53	122	2.87	79.5	4.27	47	3.92	26.1	89	31	0.74	62.73	0.233	1.87	10.86
F	79	pneumonia		122/40	67	23.1	48.2	21	3.8	171	10.94	93.2	22.64	264	13.5	26.8	5486	3257	0.38	62.73	0.263	1.54	10.86
M	81	pneumonia		100/62	75	10.4	25.9	2.86	2.86	191	18.71	91.3	11.44	186	22.5	26	32	31	0.43	70.38	0.1857	1.98	17.19
M	73	gastroenteritis		90/55	67	13.5	46.2	3.59	1.89	60	1.73	69.9	85.17	106	11.81	30.8	38	13	0.8	69.78	0.0653	2.52	10.14
M	87	soft tissue infection	1	76/48	57	14.6	26.3	0.71	3.46	272	14.82	93.9	5.31	61	6.9	34.7	10	8	0.7	63.02	0.5723	2.2	12.4
M	81	pneumonia		85/43	57	17	75.7	3.48	1.66	309	9.06	91.3	1.74	173	20.2	17	55	25	0.38	62.73	0.233	1.54	10.86
F	68	Urinary tract		84/44	57	12.8	41.6	1.46	4.07	123	15.91	88.3	5.94	71	5.3	32.1	27	17	0.38	62.73	0.263	1.54	10.86
F	55	Urinary tract		69/49	56	28	58.6	10.06	5.22	47	6.7	93.9	>100	215	13.8	28.5	43	17	0.56	71.06	0.8369	1.73	13.27
M	69	pneumonia		97/58	71	12.4	37.4	3.48	3.72	109	7.6	82	>100	179	10.3	23.9	203	193	0.51	43	1.8771	1.75	9.78
F	65	pneumonia		98/56	70	24.3	46.7	4.61	3.66	32	2.88	66.5	9.21	426	33.5	30.1	163	62	0.8	69.78	0.0653	2.52	10.14
F	65	peritonitis		85/50	62	12.9	31.1	8.19	5.22	322	12.26	80.5	>100	181	19.9	18.8	279	76	0.38	36.38	0.3688	1.84	7.74
M	65	pneumonia		95/57	70	13.3	42.3	34.33	2.42	50	23.12	93.7	4.06	208	22	21.6	41	22	0.8	69.78	0.0653	2.52	10.14
M	84	pneumonia		104/75	85	11.3	36.2	4.17	4.94	328	14.11	94.2	1.42	63	17.1	30.9	18	15	0.51	51.78	2.0625	1.54	9.41
M	87	pneumonia		130/70	90	14.9	40.3	7.2	4.02	125	11.39	87.7	62.13	254	21.1	19.7	77	33	0.49	52.45	1.2926	1.54	8.37
M	90	Infection of bile system		89/62	71	15.3	39	74.49	3.92	57	20.13	93	>100	264	13.1	32.2	278	260	0.8	69.78	0.0653	2.52	10.14
M	80	Infection of bile system		73/46	55	12.3	31.5	5.31	5.06	368	27.03	94.6	70.4	201	21.4	20.8	35	43	0.7	63.02	0.5723	2.2	12.4
M	88	Bloodstream infections		75/49	58	13.4	50.6	12.55	5.93	171	12.76	77.3	>100	264	22.18	19	118	56	0.38	62.73	0.233	1.54	10.86
F	74	Urinary tract		99/53	68	12.8	45.6	5.71	4.02	118	44.03	97.6	25.29	133	9.9	28	21	13	0.38	62.73	0.263	1.54	10.86
F	73	Infection of bile system		109/49	69	18.8	32.9	26.61	5.51	43	22.26	93.8	68.7	206	12.14	26.6	340	506	0.38	70.38	0.1857	1.54	17.19
F	63	Urinary tract		113/63	90	16.5	32.9	21.85	4.34	66	12.48	93.8	47.12	69	6.67	26.6	42	31	0.53	69.41	0.2553	1.77	14.55
M	85	Infection of bile system		75/40	52	14.4	29.9	20.72	5.76	188	13.55	97.2	>100	178.5	10.96	31.4	218	151	0.43	67.53	1.2926	1.32	13.54
F	86	pneumonia		131/68	89	13.8	37.3	8.31	2.61	230	12.48	88.8	1.08	67.6	14.58	29.8	112	47	0.43	67.53	1.2926	1.32	13.54
M	33	pneumonia		120/59	79	13	25.2	1.98	2.31	163	9.53	93.7	10.35	339	22.94	39	41	95	0.8	69.78	0.0653	2.52	10.14
M	64	Bloodstream infections		96/57	70	14.5	31.2	3.16	8.72	230	29.2	95.1	29.6	656	45.42	26.8	15	13	0.7	63.02	0.5723	2.2	12.4
F	38	pneumonia		75/63	67	37.4	180	1.48	3.5	123	5.96	82.2	0.69	31.6	2.35	30.4	18	10	0.38	70.38	0.1857	1.54	17.19
M	59	pneumonia		102/64	77	20.3	42.1	3.51	2.53	130	18.52	75.3	1.06	73.8	8.64	30.3	27	25	0.53	69.41	0.2553	1.77	14.55
F	78	pneumonia		145/91	109	11.2	32.3	0.63	4.1	384	34.01	93.3	2.37	4.03	43.5	28.4	22	15	0.43	67.53	1.2926	1.32	13.54
F	73	gastroenteritis		92/57	69	12.3	27.8	14.53	7.05	189	16	92.7	15.16	109	18.04	16.1	22	10	0.49	52.45	1.2926	1.54	8.37
F	64	Infection of bile system		75/55	62	13.5	41.3	29.29	1.89	41	9.75	86.2	3.54	155.8	14.26	28.1	256	136	0.8	69.78	0.0653	2.52	10.14
M	79	pneumonia		86/47	60	14.7	28.6	1.3	4.75	256	22.38	95.1	35.1	128	15.36	23.9	13	7	0.7	63.02	0.5723	2.2	12.4
M	49	Urinary tract		104/84	91	13.4	66.3	6.07	2.89	38	39.21	75.1	5.75	140	8.96	21.8	1048	457	0.38	62.73	0.233	1.54	10.86
F	80	gastroenteritis		81/49	60	13.3	27.5	2.36	7.31	39	37.5	95.7	>100	189	29.22	25.7	41	23	0.38	62.73	0.263	1.54	10.86
F	59	gastroenteritis		123/63	83	17.7	32.5	32.77	7.16	62	5.78	72.3	>100	248	14.49	27.7	11673	3415	0.38	70.38	0.1857	1.54	17.19
M	72	Urinary tract		102/65	77	15.7	42.1	20.14	2.25	144	18.18	96.5	86.15	116	7.08	28	207	153	0.54	75.3	0.9762	2.75	12.49
M	52	gastroenteritis		77/56	63	18.4	33.5	19.7	2.76	54	5.78	92.4	7.55	85	1.66	21.4	46	57	0.38	79.45	0.1368	3.02	16.37
M	66	peritonitis		76/50	59	18.2	57.5	14.62	1.5	51	1.42	77.3	16.27	142	23.62	23.7	586	252	0.54	75.3	0.9762	2.75	12.49
F	73	Infection of bile system		91/61	71	37.5	49	>80	1.27	115	16.57	91.1	5.3	183	14.48	25.9	2347	995	0.45	92.68	0.3771	1.58	19.01
M	73	pneumonia		87/57	67	29.1	91.1	0.73	2.33	63	17.05	81.8	17.58	231	11.61	26.5	66	9	0.54	75.3	0.9762	2.75	12.49
M	84	Infection of bile system		87/30	49	12.4	34.6	10.7	1.83	33	23.8	95.9	35.39	445	29.24	27.6	30	49	0.38	66.21	1.2908	2.45	8.9
F	71	pneumonia		81/40	54	16	39.4	8.48	4.92	63	10.65	89.8	>100	169.7	13.76	26	37	23	0.45	92.68	0.3771	1.58	19.01
F	92	pneumonia		71/41	51	13.2	26.6	2.58	3.97	224	8.64	78	0.72	141.6	30.82	30.4	33	27	0.39	49.33	1.7425	1.54	9.93
M	56	gastroenteritis		161/75	104	17.8	39.8	16.19	4.32	75	8.26	94.1	10.12	409	31.69	31.7	46	23	0.38	84.43	0.1368	3.02	16.37
M	74	gastroenteritis		109/82	91	16.6	37.7	6.84	4.09	150	19.89	95.7	>100	271	15.64	24.1	1150	278	0.54	75.3	0.9762	2.75	12.49
M	84	pneumonia		71/52	58	14.2	32	2.18	4.28	112	12.98	93.7	2.12	117	12.95	29.3	23	12	0.38	79.45	0.1368	3.02	16.37
M	66	pneumonia		95/55	68	17.6	36.2	30.3	5.61	366	20.32	83.3	11.59	126	7.33	28.1	1174	805	0.54	75.3	0.9762	2.75	12.49
F	52	Infection of bile system		145/68	94	10.7	26.4	0.41	2.65	186	13.31	94.1	20.59	363	5.18	27.9	210	451	0.45	92.68	0.3771	1.58	19.01
M	54	Infection of bile system		81/60	67	17.2	32.5	21.05	4.18	144	45.81	93	61.99	217.8	8.95	25.3	182	189	0.54	75.3	0.9762	2.75	12.49
F	57	Infection of bile system		69/51	57	12.2	27.3	3.83	3.88	61	5.55	94	1.87	53	5.77	41.4	28	26	1.23	141.1	3.115	3.03	14.39
F	57	Urinary tract		107/87	94	16.5	35.9	5.7	6.22	68	92	18.19	35.04	124	10.24	23.2	42	18	0.54	75.3	0.9762	2.75	12.49
M	77	Urinary tract		123/79	94	12.5	25.3	2.65	7.61	204	16.63	88.2	>100	456.4	32.9	30.9	46	38	0.38	55.98	1.1548	1.54	10.09
F	86	Urinary tract		77/45	56	13	32.2	2.79	3.9	276	7.4	66.9	3.6	115.5	5.49	24.7	25	22	0.54	75.3	0.9762	2.75	12.49
M	67	peritonitis		116/59	78	13.6	28.6	10.59	7.8	274	14.13	84.9	95.4	697	40	28.5	20	28	0.38	91.23	0.1368	3.02	16.37
M	49	Bloodstream infections		78/50	59	20.6	45.8	>50	4.82	26	16.16	89	29.32	231	43.6	35.6	979	720	0.38	88.55	0.1368	3.02	16.37
M	81	Bloodstream infections		58/42	47	14.7	38.6	8.61	5.82	226	9.73	48.6	16.42	380	27.38	30.8	890	295	0.38	83.03	2.6907	1.54	12.33
M	58	peritonitis		85/43	57	33.9	51.5	0.42	3.48	96	9.04	89.9	>100	655	18.24	32.1	77	74	0.71	78.43	6.8204	2.46	13.59
F	61	Bloodstream infections		109/61	57	11.4	28.8	4.14	2.9	257	16.62	76.9	18.54	196.7	16.05	34.1	184	50	0.54	143..32	0.74	1.64	14.32
M	75	pneumonia		140/80	100	15.9	34.4	21	3.2	136	2.26	86.3	53.53	57	7.05	24.3	21	52	0.43	38.61	1.2956	1.54	6.38
M	91	pneumonia		88/59	69	13.4	40.1	19.7	3.72	397	12.51	92	35.21	125	17.4	28.54	58	94	0.45	55.75	0.0342	2.07	13.26
M	86	pneumonia		85/56	66	11.9	46.6	1.85	7.71	56	2.82	75.4	12.21	165	24.2	26.8	40	33	0.38	83.03	2.6907	1.54	12.33
M	72	gastroenteritis		140/80	100	21.6	34.4	2.8	2.69	111	5.89	91	>100	112	13.1	31.58	30	45	0.63	74.93	0.9081	2.29	10.22
M	71	gastroenteritis		89/61	70	11.4	27.6	18.12	4.64	233	24.97	94.7	35.54	145	19.91	22.7	135	72	0.38	31.96	2.4719	1.54	7.51
M	86	pneumonia		102/59	74	14	27	3.52	4.05	111	11.91	89	18.54	56	3.8	24.4	36	18	0.53	83.03	0.5723	0.94	9.93
M	63	pneumonia		94/54	67	51.8	112.3	>50	1.65	45	31.12	94.2	>100	229	12.8	20.2	10747	2170	0.23	74.93	0.233	0.74	16.37
M	81	Infection of bile system		86/47	60	21.1	71.3	15.31	2.51	69	4.8	83.5	>100	291	30.3	21	2220	547	0.25	83.03	0.263	0.82	12.49
M	79	Bloodstream infections		64/41	48	13.7	33.4	1.61	3.1	148	10.5	78	5.45	179	25.7	30.5	46	11	0.74	38.61	0.1857	0.94	16.37
F	68	Infection of bile system		96/60	72	13.9	29	2.53	6.03	603	28.83	88.9	5.34	530	53.86	37.3	24	17	0.63	55.75	0.9762	0.92	12.49
M	83	peritonitis		127/61	83	12.7	40.1	3.29	3.37	257	6.73	71.5	5.54	108	6.65	28.2	28	26	1.01	55.75	0.1368	1.32	19.01
M	71	pneumonia		101/65	77	16.5	31.2	4.16	0.8	50	15.66	55.7	35.2	105	22.7	23	2132	986	1.23	83.03	0.9762	1.43	12.49
M	70	pneumonia		119/87	98	13.5	36.5	2.1	4.83	121	13.77	92.9	15.32	43	10.5	24.2	26	53	2.32	74.93	0.3771	1.12	14.39
M	88	pneumonia		124/70	88	12.8	34.8	2.73	3.72	117	1.78	74	0.06	81	5.4	28	43	19	0.43	31.96	0.9762	1.32	12.49
F	80	Infection of bile system		101/49	67	28.6	65.9	4.5	4	52	6.42	87.3	17.96	83	13.6	15.9	155	108	0.32	83.03	1.2908	1.19	10.09
M	82	gastroenteritis		68/47	54	14.9	70.2	6.09	1.53	87	4.85	92.3	84.5	390	17.9	28.5	146	140	0.19	74.93	0.3771	1.02	12.49
M	84	pneumonia		109/73	85	15.9	34.4	21	3.2	60	3.33	84	1.3	99	15.6		2585		0.25	83.03	1.7425	1.12	12.32
F	85	pneumonia		47/25	32	15.6	36.6	>50	4.5	232	19.27	94.1	5.9	233	13	11	10001	5497	0.38	31.96	0.1368	1.54	8.39
F	75	gastroenteritis		134/61	85	17	60.9	15.8	3.92	156	12.11	76.2	73.2	169	23.7				0.83	92.68	0.9762	1.54	10.32
M	80	pneumonia		91/57	68	14.4	45.1	4.45	7.83	253	16.85	88.9	2.12	137	11.1	28.8	210	101	0.53	75.3	0.1368	2.29	15.54
M	80	pneumonia		90/45	60	14.3	26.7	1.11	6.38	306	8.01	78	68.39	200	31.5	31.8	27	10	0.47	141.1	0.5723	1.54	6.38
M	85	gastroenteritis		59/39	46	13.4	40.1	19.7	3.72	83	0.72	14.2	28.5	113	13	22.1	45	5	0.72	75.3	0.233	0.94	13.26
M	79	Urinary tract		60/31	41	20.6	59.2	6.78	2.15	77	2.02	73	5.78	410	36.4	16	634	269	1.23	55.98	0.263	0.74	13.26
M	81	pneumonia		83/45	57	18.2	69.6	2.3	4.13	145	2.24	90.3	32.3	48	8				2.32	75.3	0.1857	0.82	17.41
F	89	Bloodstream infections		105/70	82	19.5	51.3	35.67	3.92	112	13.1	87	85.1	200	13.4	22.3	1151	381	0.43	91.23	0.0653	0.94	12.33
M	79	gastroenteritis		95/62	73	15.4	45.6	2.11	2.42	40	19.49	93.1	7.3	212	10.1	24.1	60	32	0.32	88.55	0.5723	0.92	10.22
M	65	pneumonia		86/50	62	11.8	35.8	6.9	9.66	154	3.62	90.7	2.5	248	24.8	21.4	70	28	0.19	38.61	0.233	1.32	10.22
M	65	pneumonia		75/44	54	13.5	55.3	6.67	3.39	113	1.95	87.5	43.2	214	20				0.25	55.75	0.263	1.43	13.26
M	65	pneumonia		84/47	59	12.7	32.2	6.26	1.07	339	13.56	93.8	4.8	285	35.7	24.6	35	30	0.38	55.75	0.8369	1.12	12.33
F	69	pneumonia		112/68	83	19.5	154.7	6.5	2.77	341	15.75	97.41	72.05	217	16.5	33.7	257	70	0.83	83.03	1.8771	1.32	10.22
F	82	gastroenteritis		108/47	67	>150	167.9	0.69	3.39	101	19.08	91.2	3.6	375	16.1	23.4	118		0.53	74.93	0.0653	1.19	10.22
M	81	gastroenteritis		54/35	42	14.4	37.2	9.46	5.76	218	4.41	62	40.29	285	24.37				0.47	31.96	0.3688	1.02	8.9
M	93	pneumonia		110/45	67	12.6	27.8	14.69	3.3	179	29.01	93.5	8.9	123	7.97	30.1	43	25	0.72	83.03	0.263	1.12	19.01
F	91	pneumonia		67/31	43	16.4	35.6	13.69	5.76	168	17.74	91.8	27.03	175.9	25.08	22.2	343	461	0.43	74.93	0.8369	1.54	9.93
M	79	pneumonia		137/79	99	150	109.9	>50	3.27	163	6.1	94	95.19	93.8	8.54				0.45	83.03	1.8771		16.37
F	78	gastroenteritis		90/43	59	13.2	28	4.5	7.05	174	12.35	93.7	>100	539	49.97	28.2	40	53	0.43	31.96	1.2956	1.54	12.49
M	66	pneumonia		104/71	82	13.5	33.3	1.57	9.06	182	15.22	85.9	5.99	82.4	9.16	26	62	62	0.45	55.75	0.0342	2.07	16.37
F	64	pneumonia		95/66	76	13.4	26.5	3.69	4.9	31	12.21	93	>100	92.1	12.77	19.4	55	21	0.63	115.99	1.2956		12.49
F	97	pneumonia		114/56	75	14.4	33.8	50.01	6.07	56	24.81	94.2	>100	279	18.03	26	40	10	0.88	115.99	0.0586	3.58	17.41
M	90	pneumonia		81/42	55	16.8	57.9	17.02	5.2	140	12.37	84.8	5.9	207	22.72	24.5	17	12	0.53	83.03	0.1368	0.94	12.33
M	84	Urinary tract		101/67	79	12.1	27.3	8.66	6.66	112	18.97	94.7	4.2	291	22.7	20.4	16	10	0.47	74.93	0.9762	0.92	10.22
F	86	pneumonia		122/41	68	17.7	33.5	34.08	6.07	50	21.48	83.1	>100	365	29.7	29.1	212	259	0.72	83.03	0.1368	1.32	10.22
M	85	pneumonia		73/59	63	14.9	68.2	23.67	3.26	191	18.9	88.4	1.01	81.2	7.71	21.8	30	106	0.43	31.96	0.5723	1.43	13.26
M	81	Urinary tract		58/42	47	14.7	38.6	8.61	5.82	226	9.73	48.6	16.42	380	27.38	30.8	890	295	0.38	55.75	0.233	1.12	12.33
M	81	pneumonia		79/51	60	13.2	32.9	3.03	4.56	136	15.25	92.5	4.67	32.9	4.58	26.8	23	10	0.63	74.93	0.263	2.29	10.22
M	86	Urinary tract		60/39	46	13.6	33.3	29.62	7.16	293	14.92	95.8	33.82	537	42.78	19.2	24	20	0.38	83.03	0.1857	2.29	10.22
F	57	pneumonia		131/68	89	13.8	37.3	8.31	2.61	230	12.48	88.8	1.08	67.6	14.58	29.8	112	47	0.43	67.53	1.2926	1.32	13.54
M	43	pneumonia		120/59	79	13	25.2	1.98	2.31	163	9.53	93.7	10.35	339	22.94	39	41	95	0.8	69.78	0.0653	2.52	10.14
M	32	Bloodstream infections		96/57	70	14.5	31.2	3.16	8.72	230	29.2	95.1	29.6	656	45.42	26.8	15	13	0.7	63.02	0.5723	2.2	12.4
F	68	pneumonia		75/63	67	37.4	180	1.48	3.5	123	5.96	82.2	0.69	31.6	2.35	30.4	18	10	0.38	70.38	0.1857	1.54	17.19
M	67	pneumonia		102/64	77	20.3	42.1	3.51	2.53	130	18.52	75.3	1.06	73.8	8.64	30.3	27	25	0.53	69.41	0.2553	1.77	14.55
F	86	pneumonia		145/91	109	11.2	32.3	0.63	4.1	384	34.01	93.3	2.37	4.03	43.5	28.4	22	15	0.43	67.53	1.2926	1.32	13.54
F	54	gastroenteritis		92/57	69	12.3	27.8	14.53	7.05	189	16	92.7	15.16	109	18.04	16.1	22	10	0.49	52.45	1.2926	1.54	8.37
F	56	Infection of bile system		75/55	62	13.5	41.3	29.29	1.89	41	9.75	86.2	3.54	155.8	14.26	28.1	256	136	0.8	69.78	0.0653	2.52	10.14
M	75	pneumonia		86/47	60	14.7	28.6	1.3	4.75	256	22.38	95.1	35.1	128	15.36	23.9	13	7	0.7	63.02	0.5723	2.2	12.4
M	52	Urinary tract		104/84	91	13.4	66.3	6.07	2.89	38	39.21	75.1	5.75	140	8.96	21.8	1048	457	0.38	62.73	0.233	1.54	10.86
F	78	gastroenteritis		81/49	60	13.3	27.5	2.36	7.31	39	37.5	95.7	>100	189	29.22	25.7	41	23	0.38	62.73	0.263	1.54	10.86
F	68	gastroenteritis		123/63	83	17.7	32.5	32.77	7.16	62	5.78	72.3	>100	248	14.49	27.7	11673	3415	0.38	70.38	0.1857	1.54	17.19
M	70	Urinary tract		102/65	77	15.7	42.1	20.14	2.25	144	18.18	96.5	86.15	116	7.08	28	207	153	0.54	75.3	0.9762	2.75	12.49
M	64	gastroenteritis		77/56	63	18.4	33.5	19.7	2.76	54	5.78	92.4	7.55	85	1.66	21.4	46	57	0.38	79.45	0.1368	3.02	16.37
M	61	peritonitis		76/50	59	18.2	57.5	14.62	1.5	51	1.42	77.3	16.27	142	23.62	23.7	586	252	0.54	75.3	0.9762	2.75	12.49
F	71	Infection of bile system		91/61	71	37.5	49	>80	1.27	115	16.57	91.1	5.3	183	14.48	25.9	2347	995	0.45	92.68	0.3771	1.58	19.01
M	78	pneumonia		87/57	67	29.1	91.1	0.73	2.33	63	17.05	81.8	17.58	231	11.61	26.5	66	9	0.54	75.3	0.9762	2.75	12.49
M	75	Infection of bile system		87/30	49	12.4	34.6	10.7	1.83	33	23.8	95.9	35.39	445	29.24	27.6	30	49	0.38	66.21	1.2908	2.45	8.9
F	69	pneumonia		81/40	54	16	39.4	8.48	4.92	63	10.65	89.8	>100	169.7	13.76	26	37	23	0.45	92.68	0.3771	1.58	19.01
F	67	pneumonia		71/41	51	13.2	26.6	2.58	3.97	224	8.64	78	0.72	141.6	30.82	30.4	33	27	0.39	49.33	1.7425	1.54	9.93
M	86	gastroenteritis		161/75	104	17.8	39.8	16.19	4.32	75	8.26	94.1	10.12	409	31.69	31.7	46	23	0.38	84.43	0.1368	3.02	16.37
M	67	gastroenteritis		109/82	91	16.6	37.7	6.84	4.09	150	19.89	95.7	>100	271	15.64	24.1	1150	278	0.54	75.3	0.9762	2.75	12.49
M	78	pneumonia		71/52	58	14.2	32	2.18	4.28	112	12.98	93.7	2.12	117	12.95	29.3	23	12	0.38	79.45	0.1368	3.02	16.37
M	76	pneumonia		95/55	68	17.6	36.2	30.3	5.61	366	20.32	83.3	11.59	126	7.33	28.1	1174	805	0.54	75.3	0.9762	2.75	12.49
F	65	Infection of bile system		145/68	94	10.7	26.4	0.41	2.65	186	13.31	94.1	20.59	363	5.18	27.9	210	451	0.45	92.68	0.3771	1.58	19.01
M	76	Infection of bile system		81/60	67	17.2	32.5	21.05	4.18	144	45.81	93	61.99	217.8	8.95	25.3	182	189	0.54	75.3	0.9762	2.75	12.49
F	65	Infection of bile system		69/51	57	12.2	27.3	3.83	3.88	61	5.55	94	1.87	53	5.77	41.4	28	26	1.23	141.1	3.115	3.03	14.39
F	48	Urinary tract		107/87	94	16.5	35.9	5.7	6.22	68	92	18.19	35.04	124	10.24	23.2	42	18	0.54	75.3	0.9762	2.75	12.49
M	75	Urinary tract		123/79	94	12.5	25.3	2.65	7.61	204	16.63	88.2	>100	456.4	32.9	30.9	46	38	0.38	55.98	1.1548	1.54	10.09
F	76	Urinary tract		77/45	56	13	32.2	2.79	3.9	276	7.4	66.9	3.6	115.5	5.49	24.7	25	22	0.54	75.3	0.9762	2.75	12.49
M	71	peritonitis		116/59	78	13.6	28.6	10.59	7.8	274	14.13	84.9	95.4	697	40	28.5	20	28	0.38	91.23	0.1368	3.02	16.37
M	65	Bloodstream infections		78/50	59	20.6	45.8	>50	4.82	26	16.16	89	29.32	231	43.6	35.6	979	720	0.38	88.55	0.1368	3.02	16.37
M	46	Bloodstream infections		58/42	47	14.7	38.6	8.61	5.82	226	9.73	48.6	16.42	380	27.38	30.8	890	295	0.38	83.03	2.6907	1.54	12.33
M	45	peritonitis		85/43	57	33.9	51.5	0.42	3.48	96	9.04	89.9	>100	655	18.24	32.1	77	74	0.71	78.43	6.8204	2.46	13.59
F	57	Bloodstream infections		109/61	57	11.4	28.8	4.14	2.9	257	16.62	76.9	18.54	196.7	16.05	34.1	184	50	0.54	143..32	0.74	1.64	14.32
M	67	pneumonia		140/80	100	15.9	34.4	21	3.2	136	2.26	86.3	53.53	57	7.05	24.3	21	52	0.43	38.61	1.2956	1.54	6.38
M	68	pneumonia		91/57	68	14.4	45.1	4.45	7.83	253	16.85	88.9	2.12	137	11.1	28.8	210	101	0.53	75.3	0.1368	2.29	15.54
M	65	pneumonia		90/45	60	14.3	26.7	1.11	6.38	306	8.01	78	68.39	200	31.5	31.8	27	10	0.47	141.1	0.5723	1.54	6.38
M	57	gastroenteritis		59/39	46	13.4	40.1	19.7	3.72	83	0.72	14.2	28.5	113	13	22.1	45	5	0.72	75.3	0.233	0.94	13.26
M	75	Urinary tract		60/31	41	20.6	59.2	6.78	2.15	77	2.02	73	5.78	410	36.4	16	634	269	1.23	55.98	0.263	0.74	13.26
M	80	pneumonia		83/45	57	18.2	69.6	2.3	4.13	145	2.24	90.3	32.3	48	8				2.32	75.3	0.1857	0.82	17.41
F	78	Bloodstream infections		105/70	82	19.5	51.3	35.67	3.92	112	13.1	87	85.1	200	13.4	22.3	1151	381	0.43	91.23	0.0653	0.94	12.33
M	67	gastroenteritis		95/62	73	15.4	45.6	2.11	2.42	40	19.49	93.1	7.3	212	10.1	24.1	60	32	0.32	88.55	0.5723	0.92	10.22
M	76	pneumonia		86/50	62	11.8	35.8	6.9	9.66	154	3.62	90.7	2.5	248	24.8	21.4	70	28	0.19	38.61	0.233	1.32	10.22
M	56	pneumonia		84/47	59	12.7	32.2	6.26	1.07	339	13.56	93.8	4.8	285	35.7	24.6	35	30	0.38	55.75	0.8369	1.12	12.33
F	67	pneumonia		112/68	83	19.5	154.7	6.5	2.77	341	15.75	97.41	72.05	217	16.5	33.7	257	70	0.83	83.03	1.8771	1.32	10.22
F	81	gastroenteritis		108/47	67	>150	167.9	0.69	3.39	101	19.08	91.2	3.6	375	16.1	23.4	118		0.53	74.93	0.0653	1.19	10.22
M	78	gastroenteritis		54/35	42	14.4	37.2	9.46	5.76	218	4.41	62	40.29	285	24.37				0.47	31.96	0.3688	1.02	8.9
M	86	pneumonia		110/45	67	12.6	27.8	14.69	3.3	179	29.01	93.5	8.9	123	7.97	30.1	43	25	0.72	83.03	0.263	1.12	19.01
F	87	pneumonia		67/31	43	16.4	35.6	13.69	5.76	168	17.74	91.8	27.03	175.9	25.08	22.2	343	461	0.43	74.93	0.8369	1.54	9.93
M	78	pneumonia		137/79	99	150	109.9	>50	3.27	163	6.1	94	95.19	93.8	8.54				0.45	83.03	1.8771		16.37
F	81	gastroenteritis		90/43	59	13.2	28	4.5	7.05	174	12.35	93.7	>100	539	49.97	28.2	40	53	0.43	31.96	1.2956	1.54	12.49
F	76	pneumonia		95/66	76	13.4	26.5	3.69	4.9	31	12.21	93	>100	92.1	12.77	19.4	55	21	0.63	115.99	1.2956		12.49
