# Supplementary material for: Prognostic significance of thyroid hormone T3 in patients with septic shock: a retrospective cohort study
Source: PeerJ. 2023 May 16;11:e15335. doi: 10.7717/peerj.15335 (PMC10198161; doi:10.7717/peerj.15335)
Supplement: Supplemental Information 1 [file peerj-11-15335-s001.xlsx]

## Sheet: Sheet1
	IL-6	SOFA
1	12.02	3	1:survivor group
1	64.51	5	2:non-survivor group
1	11.39	9
1	159.36	7
1	3.65	8
1	30.77	11
1	13.96	6
1	548.13	5
1	132.63	12
1	952.79	4
1	30.87	4
1	27.38	6
1	1890.3	7
1	9.54	9
1	84.27	6
1	232.47	7
1	1134.32	5
1	183	12
1	2567	14
1	952.79	15
1	30.87	10
1	27.38	12
1	726.88	14
1	8.43	13
1	9.92	9
1	16.26	13
1	43.28	12
1	54.99	8
1	12.31	9
1	13.98	7
1	62.64	8
1	8.73	9
1	14.17	14
1	8.82	12
1	887.96	13
1	113.58	10
1	75.89	9
1	24.89	14
1	33.85	17
1	91.51	12
1	29.4	8
1	38.1	12
1	37.02	9
1	61.52	8
1	53.18	11
1	175.64	12
1	15.72	8
1	118.32	13
1	4	12
1	16.41	10
1	515	5
1	133.33	7
1	74.2	6
1	2.72	5
1	241.2	5
1	30.44	3
1	230.09	5
1	98.43	9
1	129.91	7
1	55.32	8
1	229.02	11
1	21.98	6
1	9.78	5
1	160.75	12
1	151.28	4
1	26.31	7
1	4.17	6
1	85.01	7
1	25.96	9
1	617.63	6
1	90.1	7
1	243	5
1	71.85	12
1	2790.49	14
1	1611.73	15
1	53.35	10
1	129.47	12
1	159.36	14
1	398.65	11
1	30.77	12
1	1213.96	10
1	548.13	8
1	1302.63	9
1	952.79	7
1	30.87	8
1	27.38	7
1	1820.3	9
1	1829.54	10
1	1284.27	11
1	232.47	12
1	114.32	9
1	183	12
1	256.7	9
1	952.79	10
1	30.87	11
1	27.38	8
1	726.88	9
1	8.43	11
1	299.92	12
1	1611.26	9
1	43.28	10
1	54.99	11
1	5412.31	8
1	193.98	9
1	672.64	10
1	55.32	5
1	229.02	4
1	21.98	7
1	9.78	8
1	160.75	5
1	1531.28	6
1	226.31	6
1	4.17	7
1	85.01	4
1	25.96	3
1	61.53	4
1	90.1	4
1	243	4
1	71.85	5
1	783	6
1	34.73	5
1	2121.21	8
1	8.53	9
2	7.43	8
2	11157.9	7
2	2412	6
2	30.44	12
2	230.09	13
2	102.43	10
2	129.91	9
2	55.32	8
2	229.02	7
2	21.98	8
2	9.78	12
2	160.75	15
2	151.28	16
2	26.31	12
2	4.17	12
2	85.01	13
2	25.96	9
2	6170.63	8
2	90.1	9
2	2744	9
2	78.85	10
2	279.49	10
2	16611.7	11
2	53.35	12
2	129.47	13
2	13.55	10
2	14.56	9
2	22427.2	13
2	1015.24	17
2	217.2	16
2	116.17	15
2	8.78	12
2	146.68	13
2	12256.7	9
2	287.16	10
2	1675.37	11
2	19.73	10
2	26.27	9
2	195.5	11
2	264.85	15
2	4.17	16
2	85.01	16
2	25.96	15
2	6170.63	11
2	90.1	15
2	2744	14
2	78.85	13
2	279.49	11
2	16611.7	17
2	53.35	16
2	129.47	18
2	13.55	16
2	14.56	16
2	22427.2	15
2	1015.24	16
2	217.2	17
2	116.17	15
2	8.78	12
2	146.68	13
2	12256.7	11
2	1015.24	10
2	217.2	11
2	1150.32	12
